# Supplementary material for: TiO2hollow fibers with internal interconnected nanotubes prepared by atomic layer deposition for improved photocatalytic activity
Source: Royal Society of Chemistry journal article supplement (doi:10.1039/c4ra06807f), 2014-08-12
Supplement: c4ra06807f1.pdf [file c4ra06807f1.pdf]

## Supporting Information

### TiO<sub>2</sub> Hollow Fibers with Internal Interconnected Nanotubes Prepared by Atomic Layer Deposition for Improved Photocatalytic Activity

Hsueh-Shih Chen,<sup>a</sup> Po-Hsun Chen,<sup>a</sup> Jeng-Liang Kuo,<sup>b</sup> Yang-Chih Hsueh<sup>a</sup> and Tsong-Pyng Perng<sup>a</sup>

<sup>a</sup> Department of Materials Science and Engineering, National Tsing Hua University, Hsinchu 300, Taiwan, E-mail: chenhs@mx.nthu.edu.tw, tpperng@mx.nthu.edu.tw

<sup>b</sup> Material and Chemical Laboratories, Industrial Technology Research Institute, Sec. 2, Kuan-Fu Road, Hsinchu 300, Taiwan

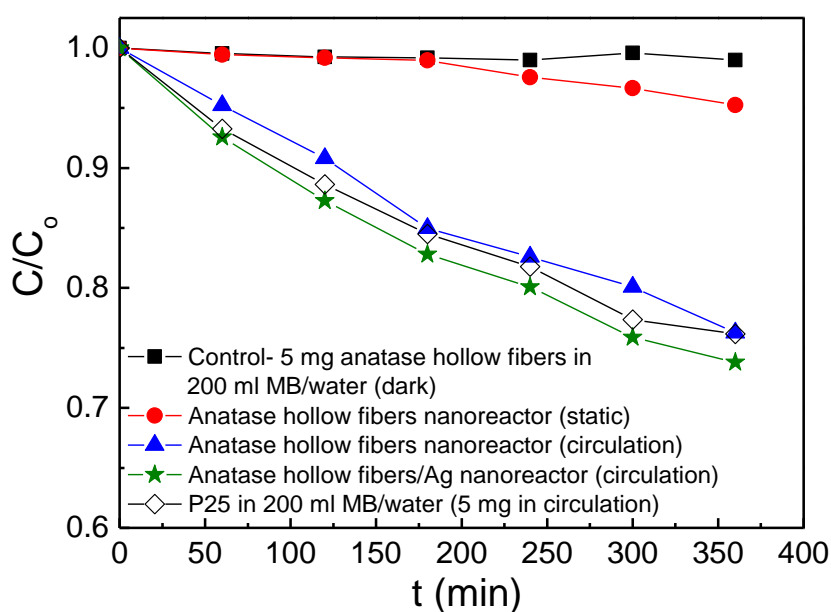

Figure S1 Photodegradation curves of TiO<sub>2</sub> HFs and TiO<sub>2</sub>/Ag in the reactor operating in a continuous flushing flow (circulation), TiO<sub>2</sub> HF in the same reactor in a static condition and P25 in the continuous flow were tested for comparison.
